# Supplementary material for: Alkaline steaming-assisted conversion: a new strategy for the synthesis of pure NiFe2O4 and CoFe2O4 spinel ferrite nanoparticles
Source: Royal Society of Chemistry journal article supplement (doi:10.1039/d2nj02281h), 2022-01-01
Supplement: d2nj02281h1.pdf [file d2nj02281h1.pdf]

## Supporting information

### Alkaline steaming-assisted conversion: a new strategy for the synthesis of pure $\text{NiFe}_2\text{O}_4$ and $\text{CoFe}_2\text{O}_4$ spinel ferrite nanoparticles

Hua Li<sup>\*,a,b</sup>, Ralf Brüning<sup>c</sup>, Jian Liang<sup>d</sup>, Weihui Jiang<sup>a,d</sup>, Jacques Robichaud<sup>b</sup>, Jianmin Liu<sup>d</sup>, Yahia Djaoued<sup>\*,b</sup>

<sup>a</sup>, Department of Materials Chemistry, School of Materials Science and Engineering, Jingdezhen Ceramic University, Jingdezhen, Jiangxi, 333403, PR China, Tel: +86 798 8499678, E-mail: [201002@jci.edu.cn](mailto:201002@jci.edu.cn);

<sup>b</sup>, Laboratoire de Recherche en Matériaux et Micro-spectroscopies Raman et FTIR, Université de Moncton-Campus de Shippagan, Shippagan, NB, E8S1P6, Canada. Fax: +1 506 336 3434; Tel: +1 506 336 3412; E-mail: [yahia.djaoued@umoncton.ca](mailto:yahia.djaoued@umoncton.ca)

<sup>c</sup>, Physics Department, Mount Allison University, Sackville, N.B., Canada E4L 1E6

<sup>d</sup>, National Engineering Research Center for Domestic & Building Ceramics, Jingdezhen Ceramic Institute, Jingdezhen, Jiangxi, 333001, PR China, Tel: +86 798 8499328.

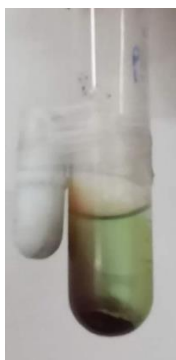

**Figure S1.** Washing solution from sample A0 processed at 140°C for 16 h.

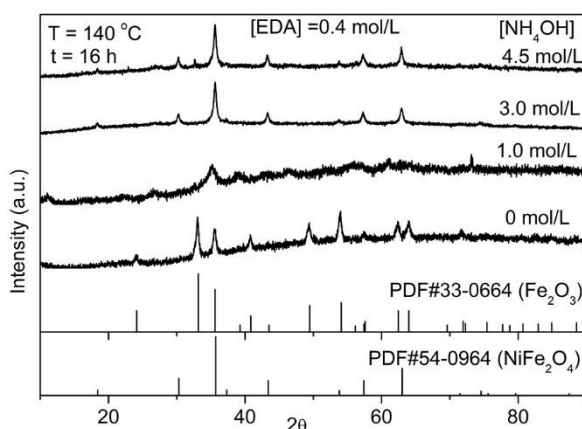

**Figure S2.** XRD patterns of Samples processed 140°C for 16 h from various concentrations of ammonia and 0.4 mol/L of EDA.

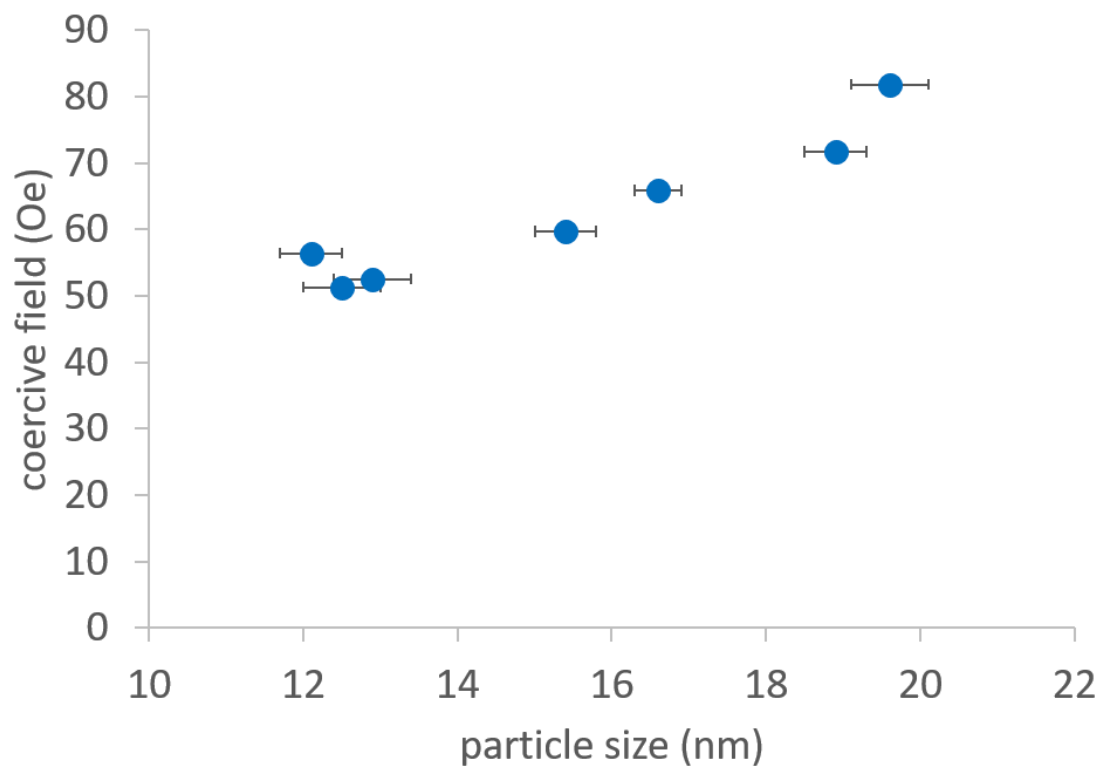

Figure S3. Coercivity of samples with 86.1% or more  $\text{NiFe}_2\text{O}_4$  as a function of their particle size
